# Reduced Vestibular Function is Associated with Cortical Surface Shape Changes in the Frontal Cortex

Dominic Padova  \*<sup>1</sup>, J. Tilak Ratnanather  <sup>2</sup>, Andreia V. Faria  <sup>3</sup>, and Yuri Agrawal<sup>4,5</sup>

<sup>1</sup>Center for Imaging Science, Department of Biomedical Engineering, Johns Hopkins University, Baltimore, MD, USA

<sup>2</sup>Center for Imaging Science and Institute for Computational Medicine, Department of Biomedical Engineering, Johns Hopkins University, Baltimore, MD, USA

<sup>3</sup>Department of Radiology, Johns Hopkins University School of Medicine, Baltimore, MD, USA

<sup>4</sup>Department of Otolaryngology – Head and Neck Surgery, Johns Hopkins University School of Medicine, Baltimore, MD, USA

<sup>5</sup>Department of Otolaryngology – Head and Neck Surgery, University of Colorado Anschutz Medical Campus, Aurora, CO, USA

## Abstract

Aging-associated decline in peripheral vestibular function is linked to deficits in executive ability, self-motion perception, and motor planning and execution. While these behaviors are known to rely on the sensorimotor and frontal cortices, the precise pathways involving the frontal and sensorimotor cortices in these vestibular-associated behaviors are unknown. To fill this knowledge gap, this cross-sectional study investigates the relationship between age-related variation in vestibular function and surface shape alterations of the frontal and sensorimotor cortices, considering age, intracranial volume, and sex. Data from 117 participants aged 60+ from the Baltimore Longitudinal Study of Aging, who underwent end-organ-specific vestibular tests (cVEMP for the saccule, oVEMP for the utricle, and vHIT for the horizontal canal) and T1-weighted MRI scans on the same visit, were analyzed. We examined ten brain structures in the putative “vestibular cortex”: the middle-superior part of the prefrontal cortex (SFG\_PFC), frontal pole (SFG\_pole), and posterior pars of the superior frontal gyrus (SFG), the dorsal prefrontal cortex and posterior pars of middle frontal gyrus (MFG\_DPFC, MFG), the pars opercularis, pars triangularis, and pars orbitalis of the inferior frontal gyrus, as well as the precentral gyrus and postcentral gyrus (PoCG) of the sensori-

\*Corresponding author: Dominic Padova, [dpadova95@gmail.com](mailto:dpadova95@gmail.com)  
NOTE: This preprint reports new research that has not been certified by peer review and should not be used to guide clinical practice.

29 motor cortex. For each region of interest (ROI), shape descriptors were estimated as local  
30 compressions and expansions of the population average ROI surface using surface LDDMM.  
31 Shape descriptors were linearly regressed onto standardized vestibular variables, age, in-  
32 tracranial volume, and sex. Lower utricular function was linked with surface compression  
33 in the left MFG and expansion in the bilateral SFG\_pole and left SFG. Reduced canal func-  
34 tion was associated with surface compression in the right SFG\_PFC and SFG\_pole and left  
35 SFG. Both reduced saccular and utricular function correlated with surface compression in  
36 the posterior medial part of the left MFG. Our findings illuminate the complexity of the re-  
37 lationship between vestibular function and the morphology of the frontal and sensorimotor  
38 cortices in aging. Improved understanding of these relationships could help in developing  
39 interventions to enhance quality of life in aging and populations with cognitive impairment.

40

41 **Keywords:** Aging, Vestibular, VEMP, VOR, Shape Analysis, LDDMM, Cortex

## 42 1 Introduction

43 The five organs of the peripheral vestibular system, the saccule, the utricle, and the three semi-  
44 circular canals, send information about self-motion relative to gravity to a widespread network  
45 of multi-sensorimotor brain regions [1, 2, 3, 4, 5]. The vestibular network is involved not only  
46 in the maintenance of balance, posture, and stable vision, but also in autonomic, affective, and  
47 higher-order behaviors [6]. Additionally, vestibular function has been linked with neurodegen-  
48 erative diseases that impact these functions, such as dementia [7, 8, 9, 10], multiple sclerosis  
49 [11], Huntington’s disease [12], and Parkinson’s disease [13, 14, 15, 16, 17, 18, 19, 20]. Given  
50 that vestibular structure and function are known to decline with aging [21, 22, 23, 24, 25, 26, 27],  
51 age-related vestibular dysfunction may play a role in balance and cognitive phenotypes in aging  
52 and disease. In older adults, age-related vestibular loss is related to deficits in higher-order be-  
53 haviors, such as attention, visuospatial cognitive ability, executive ability, memory, self-motion  
54 perception, and motor planning and execution [28, 29, 30, 31, 32, 33]. For all our expanding  
55 knowledge of the relationship between age-related vestibular loss and both higher-order behav-  
56 iors and neurodegenerative diseases, significant gaps exist in our understanding of the involved  
57 neuroanatomical circuits.

58 The postcentral gyrus, precentral gyrus, and the frontal cortex are vital regions in the vestibular  
59 cognitive network [6]. The postcentral and precentral gyri are involved in sensorimotor function,

60 and the prefrontal cortex is involved in executive function. These regions receive and process  
61 vestibular and multi-sensorimotor information, including hearing, vision, and proprioception,  
62 via thalamo-cortical and cortico-cortical pathways [1, 5, 3]. However, the evidence of the re-  
63 lationships between peripheral vestibular function and the structures of the postcentral gyrus,  
64 precentral gyrus, and prefrontal cortex has been inconsistent [34, 35, 36, 37, 38, 39, 40, 41,  
65 42]. Several studies have identified structural alterations in the somatosensory [34, 41, 42],  
66 motor [39, 41], and prefrontal cortices [37, 39, 41, 42] with vestibular dysfunction. Furthermore,  
67 previous studies of age-related end-organ functions did not examine these multi-sensorimotor  
68 regions [43, 44, 45].

69 To fill these knowledge gaps, we used MRI scans, vestibular, hearing, vision, and proprioception  
70 physiologic data from 117 healthy, older adults from the Baltimore Longitudinal Study of Aging  
71 to answer two questions:

- 72 1. Is age-related vestibular function related to prefrontal and sensorimotor cortex surface  
73 morphology in healthy, older adults?
- 74 2. Do vestibular-associated morphological alterations in the prefrontal and sensorimotor  
75 cortices persist after accounting for multisensory involvement?

76 This cohort and its measurements were used in previous studies by our group [43, 44] that  
77 explored distinct research questions involving a different cognitive network. We hypothesized  
78 that higher functioning of the saccule, utricle, and horizontal semi-circular canal is related to  
79 surface shape alterations in the regions of interest, even after accounting for multi-sensory  
80 function (hearing, vision, and proprioception). This study significantly extends our previous  
81 vestibular-only study of prefrontal and sensorimotor volumes, as shape can vary in more com-  
82 plicated, local patterns than does gross volume [42]. This study will improve the understanding  
83 of the consequences of aging on the vestibular pathways involved in vestibular cognition. An im-  
84 proved understanding will aid in developing rational strategies to preserve vestibular-mediated  
85 behaviors in aging and disease.

## 86 **2 Data and methods**

### 87 **2.1 Study sample**

88 The data is a subset of 117 healthy older (aged  $\geq 60$  years) participants from the Baltimore Lon-  
89 gitudinal Study of Aging (BLSA) who had MRI brain scans and vestibular testing in the same  
90 visit between 2013 and 2015 [46]. All participants provided written informed consent. The BLSA  
91 study protocol (03-AG-0325) was approved by the National Institute of Environmental Health  
92 Sciences Institutional Review Board. Hearing loss, visual acuity loss, and proprioceptive loss  
93 were measured and included as confounding variables in follow-up hypothesis tests. Hearing  
94 loss was measured as the speech-frequency pure tone average of air-conduction thresholds at  
95 0.5, 1, 2, and 4 kHz from the better ear. Visual acuity loss, which refers to how much a pattern  
96 must differ in size to be seen, was measured as the angular deviation in logMAR units and ranges  
97 from 0.80 to -0.30 logMAR, where lower values indicate better acuity. Proprioceptive loss was  
98 measured as the degree of ankle deflection perceptible according to an established BLSA pro-  
99 cedure [47]. For analysis, the hearing, vision, and proprioceptive variables were treated as  
100 continuous variables and were negated so that increasing values indicate better function.

### 101 **2.2 Vestibular physiologic testing**

102 Vestibular function testing included measurement of saccular function using the cervical vestibular-  
103 evoked myogenic potential (cVEMP) test, of utricular function using the ocular VEMP (oVEMP)  
104 test, and of horizontal semicircular canal function using the video head-impulse test (vHIT),  
105 following established procedures [7, 48, 49, 50].

#### 106 **2.2.1 Cervical vestibular-evoked myogenic potential (cVEMP) test**

107 The cVEMP test measures the function of the saccule (and inferior vestibular nerve) [7, 48, 49,  
108 50]. Participants sat on a chair inclined at  $30^\circ$  above the horizontal plane. Trained examiners  
109 positioned EMG electrodes bilaterally on the sternocleidomastoid and sternoclavicular junction,  
110 with a ground electrode on the manubrium sterni. Participants were instructed to turn their  
111 heads to generate at least a  $30 \mu V$  background response prior to delivering sound stimuli. Bursts  
112 of 100 auditory stimuli of 500 Hz and 125 dB were administered monaurally through  
113 headphones (VIASYS Healthcare, Madison, WI). cVEMPs were recorded as short-latency EMGs  
114 of the inhibitory response of the ipsilateral sternocleidomastoid muscle. To calculate corrected

115 cVEMP amplitudes, nuisance background EMG activity collected 10 ms prior to the onset of the  
116 auditory stimulus were removed. The higher corrected cVEMP amplitude (unitless) from the left  
117 and right sides was used as a continuous measure of saccular function. A difference of 0.5 in  
118 corrected cVEMP is considered clinically relevant [48].

## 119 **2.2.2 Ocular vestibular-evoked myogenic potential (oVEMP) test**

120 The oVEMP test measures the function of the utricle (and superior vestibular nerve) [7, 48, 49,  
121 50]. Participants sat on a chair inclined at 30° above the horizontal plane. Trained examiners  
122 placed a noninverting electrode ≈3 mm below the eye centered below the pupil, an inverting  
123 electrode 2 cm below the noninverting electrode, and a ground electrode on the manubrium  
124 sterni. To ensure that symmetric signals are recorded from both eyes, participants were in-  
125 structed to perform multiple 20° vertical saccades before stimulation. During oVEMP testing,  
126 participants were instructed to maintain an upward gaze of 20°. Head taps (vibration stimuli)  
127 applied to the midline of the face at the hairline and ≈30% of the distance between theinion  
128 and nasion using a reflex hammer (Aesculap model ACO12C, Center Valley, PA). oVEMPs were  
129 recorded as short-latency EMGs of the excitation response of the contralateral external oblique  
130 muscle of the eye. The higher oVEMP amplitude ( $\mu V$ ) from the left and right sides was used as a  
131 continuous measure of utricular function. A difference of 5  $\mu V$  in oVEMP is considered clinically  
132 relevant [48].

## 133 **2.2.3 Video head impulse test (vHIT)**

134 The vHIT measures the horizontal vestibular-ocular reflex (VOR) [7, 51, 52] and was performed  
135 using the EyeSeeCam system (Interacoustics, Eden Prairie, MN) in the same plane as the right  
136 and left horizontal semicircular canals [52, 53, 54]. To position the horizontal canals in the  
137 plane of stimulation, trained examiners tilted the participant's head downward 30° below the  
138 horizontal plane and instructed participants to maintain their gaze on a wall target ≈1.5 m away.  
139 The examiner delivered rotations of 5-10° (≈150-250° per second) to the participant's head.  
140 The head impulses are performed at least 10 times parallel to the ground toward the right and  
141 left, chosen randomly for unpredictability. The EyeSeeCam system quantified eye and head  
142 velocity. VOR gain was calculated as the unitless ratio of the eye velocity to the head velocity.  
143 A VOR gain equal to 1.0 is normal and indicates equal eye and head velocities. The mean VOR  
144 gain from the left and right sides was used as a continuous variable. A difference of 0.1 in VOR

145 gain is considered clinically relevant [7, 48].

### 146 **2.3 Structural MRI acquisition**

147 T1-weighted volumetric MRI scans were acquired in the sagittal plane using a 3T Philips Achieva  
148 scanner at the National Institute on Aging Clinical Research Unit. The sequence used was a T1-  
149 weighted image (WI) (magnetization prepared rapid acquisition with gradient echo (MPRAGE);  
150 repetition time (TR)=6.5 ms, echo time (TE)=3.1 ms, flip angle=8°, image matrix=256×256, 170  
151 slices, voxel area=1.0×1.0 mm, 1.2 mm slice thickness, FOV=256×240 mm, sagittal acquisition).  
152 Scans were automatically segmented using MRICloud (<https://www.mricloud.org/>) with the  
153 T1 multi-atlas set “BIOCARD3T\_297labels\_10atlases\_am\_hi\_erc\_M2\_252\_V1”.

### 154 **2.4 MRI processing pipeline**

155 Our analysis focuses on the ten regions of interest (ROIs) relevant to our hypothesis and shown in  
156 Figure 1. These ROIs include the middle-superior part of the prefrontal cortex (SFG\_PFC), frontal  
157 pole (SFG\_pole), and posterior pars of the superior frontal gyrus (SFG), the dorsal prefrontal  
158 cortex and posterior pars of middle frontal gyrus (MFG\_DPFC, MFG), the pars opercularis, pars  
159 triangularis, and pars orbitalis of the inferior frontal gyrus (IFG), as well as the precentral gyrus  
160 (PrCG), postcentral gyrus (PoCG) of the sensorimotor cortex. Intracranial volume was comprised  
161 of bilateral cerebral volumes, cerebellum, brainstem, and cerebrospinal fluid. We followed a  
162 procedure similar to those described in previous studies investigating sub-cortical changes  
163 associated with mild cognitive impairment and Alzheimer’s disease [55, 56, 57], Huntington’s  
164 disease [58], attention deficit hyperactivity disorder [59], and schizophrenia [60, 61]. Figure 2  
165 depicts an overview of the neuroimaging pipeline.

### 166 **2.5 Shape analysis**

167 For each 3D segmented ROI, surface meshes with  $\approx 800$  vertices were generated using a re-  
168 stricted Delaunay triangulation. Using the MRICloud surface template generation pipeline, the  
169 collection of ROI surfaces was used to estimate left- and right-side population templates (i.e.  
170 the average shape) agnostic to diagnostic criteria by an LDDMM-based surface template es-  
171 timation procedure after rigid alignment [64]. The MRICloud template-to-population surface  
172 mapping pipeline was used to register each participant’s surface to the population template,

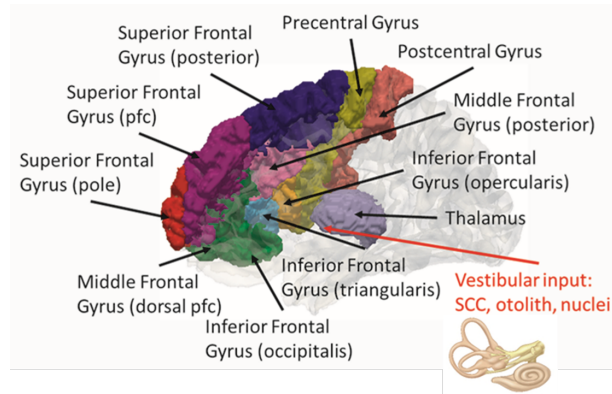

Figure 1: **Putative vestibular-thalamocortical and cortico-cortical circuits.** Vestibular information from the semicircular canals, otoliths, and vestibular nuclei reaches the precentral and postcentral gyri of the sensorimotor cortex and the frontal gyrus via the thalamo-cortical and cortico-cortical circuits. The red arrow indicates the ventral lateral nucleus of the thalamus which putatively receives vestibular input. CAWorks ([www.cis.jhu.edu/software/caworks](http://www.cis.jhu.edu/software/caworks)) was used for visualization. Key: pfc: prefrontal cortex; SCC: semicircular canals.

173 first rigidly then diffeomorphically using surface LDDMM [64]. Surface shape alterations were  
174 measured by the logarithms of surface and normal Jacobian determinants of the diffeomor-  
175 phic transformation at each vertex. The surface Jacobian is calculated as the ratio between  
176 the surface area of the faces attached to a vertex pre- and post-transformation. The normal  
177 Jacobian is the ratio between the full Jacobian and the surface Jacobian. Whereas the surface  
178 Jacobian refers to change in surface area pre- and post-transformation, the normal Jacobian  
179 refers to the change in normal distance pre- and post-transformation. A positive (negative) sur-  
180 face log-Jacobian value denotes an expansion (contraction) of the template around that vertex  
181 in the direction tangent to the surface to fit the subject. Similarly, a positive (negative) nor-  
182 mal Jacobian value denotes an expansion (contraction) of the template around that vertex in  
183 the direction normal to the surface to fit the subject. We analyze the surface and normal log-  
184 Jacobians independently. To increase the power of the analyses and to improve computational  
185 efficiency, the surfaces were spectrally clustered into  $k \in \{10, \dots, 20\}$  clusters of size  $\approx 150-400$   
186  $mm^2$  based on the surface geometry of the template, as described previously [58]. Thus, the  $k$   
187 shape descriptor variables attached with each subject structure were used as separate outcome  
188 variables for hypothesis testing.

## 189 2.6 Statistical modeling

190 For participants with missing vestibular data, we carried over data from an adjacent prior or  
191 subsequent visit using an external longitudinal dataset comprised of the same participants

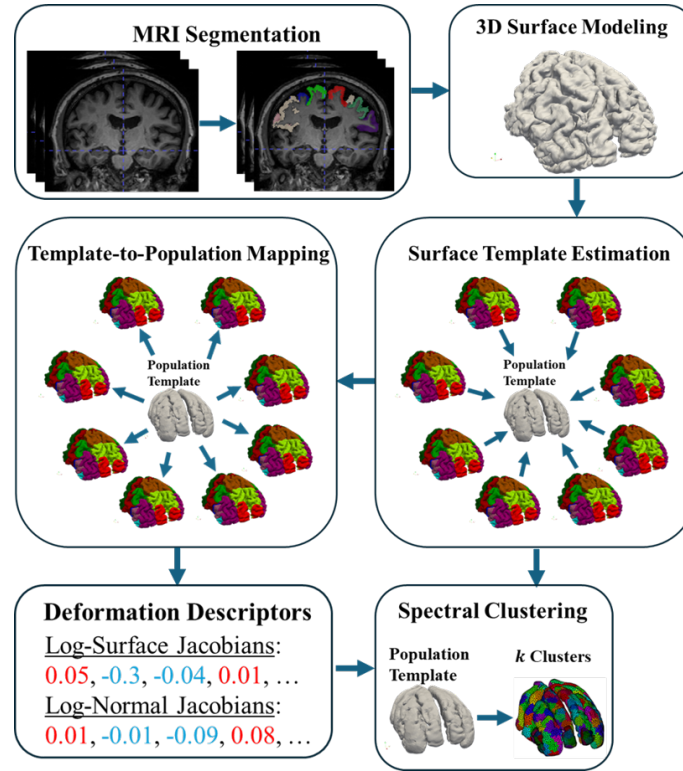

Figure 2: **Neuroimaging pipeline.** Using T1-weighted MRI scans as inputs, MRICloud automatically outputs a whole-brain parcellation using a study-appropriate multi-atlas and LDDMM. Taking the binary image segmentations of the subset of regions of interest (eight subregions of the frontal cortex, the precentral gyrus, and the postcentral gyrus), 3D surfaces for each structure created using a restricted Delaunay triangulation. Then the collection of surfaces for each structure is uploaded to the MRICloud Shape Analysis pipeline [62, 63] to perform surface template estimation and subsequently template-to-population mapping. The output vertex-wise deformation descriptors (the logarithms of the surface and normal Jacobians) are then reduced to  $k$  descriptors based on spectral clustering for downstream statistical testing. Quality control was performed at each stage.

192 [65]. Whereas our original dataset had 58, 64, and 91 observations for cVEMP, oVEMP, and VOR,  
 193 respectively, the imputed dataset had 95, 100, 107 observations for cVEMP, oVEMP, and VOR,  
 194 respectively. Using this imputed dataset, multiple linear regression adjusted for age, intracranial  
 195 volume, and sex was used to investigate the relationship between local shape descriptors and  
 196 vestibular function. The null hypothesis,  $H_{0A}$ , in Eq. (1) predicts the (normal, surface) Jacobian  
 197  $jac_i$ , for participant  $i, i = 1, \dots, N$ . The alternate hypothesis  $H_1$ , predicts the (normal, surface)  
 198 Jacobian  $jac_i$  using a vestibular variable,  $vest_i$  in Eq. (2), such as best corrected cVEMP, best  
 199 oVEMP, and mean VOR gain as continuous independent variables,

$$H_{0A} : jac_i = c_0 + c_2 age_i + c_3 isFemale_i + c_4 icv_i + \epsilon_i \quad (1)$$

$$H_1 : jac_i = c_0 + c_1 vest_i + c_2 age_i + c_3 isFemale_i + c_4 icv_i + \epsilon_i \quad (2)$$



200 To test whether the addition of the function of hearing, vision, or proprioception either explains  
201 away or masked vestibular relationships, we performed three additional bivariate sensory hy-  
202 pothesis tests. The null hypothesis,  $H_{0B}$ , in Eq. (3) and the alternative hypothesis,  $H_2$ , in Eq. (4)  
203 additionally covary for the *sensory* variable, which represents hearing function, vision function,  
204 or proprioceptive function,

$$H_{0B} : jac_i = c_0 + c_2age_i + c_3isFemale_i + c_4icv_i + c_5sensory + \epsilon_i \quad (3)$$

$$H_2 : jac_i = c_0 + c_1vest_i + c_2age_i + c_3isFemale_i + c_4icv_i + c_5sensory + \epsilon_i \quad (4)$$

205 In hypothesis tests  $\{H_{0A}, H_{0B}, H_1, H_2\}$ ,  $c_0$  corresponds to the global average,  $age_i$  is the age  
206 in years of subject  $i$ ,  $isFemale_i$  is a binary indicator variable for the sex of subject  $i$  (1=female,  
207 0=male), and  $icv_i$  denotes the intracranial volume of subject  $i$ . We assumed that the  
208 log-Jacobian of the surface transformation depends linearly on age. We also assumed that the  
209 measurement noise  $\epsilon_i$  is independently and identically distributed zero-mean Gaussian with  
210 unknown, common variance. The unknown effects  $\{c_0, c_1, c_2, c_3, c_4, c_5\}$  were estimated via least-  
211 squares. To determine whether the study sample is stable and that our individual results are  
212 not driven by outliers or extreme values, we performed permutation testing according to an es-  
213 tablished procedure [43]. The vestibular variable was permuted across all clusters on a surface  
214 under the null hypotheses,  $H_{0A}$  and  $H_{0B}$ , for 10,000 simulations. The maximum test statistic,  
215 calculated as the maximum of the ratio of maximum squared errors of the null to the alterna-  
216 tive model, was calculated for both the real and simulated models. The overall permutation  
217 p-value,  $p_{perm}$ , is calculated as the proportion of simulated max test statistics greater than true  
218 (non-simulated) max test statistics. We rejected the null hypothesis if  $p_{perm} < 0.05$ . Thus, the  
219 p-values from testing across clusters are corrected for Family-Wise Error Rate (FWER) at the  
220 0.05-level. Furthermore, a cluster  $k$  is significant if the true test statistic is greater than the  
221 95th percentile of simulated test statistics. For clusters which rejected the null hypotheses,  
222  $H_{0A}$  ( $H_{0B}$ ), 95% confidence intervals were calculated by bootstrapping model residuals under  
223 the alternative hypothesis,  $H_1$  ( $H_2$ ), to mitigate the effects of outliers. Bootstrapped studentized  
224 confidence intervals were computed by bootstrapping model residuals with 10,000 simulations  
225 using the *bootci* function in Matlab. All analyses were implemented in Matlab.

## 226 3 Results

### 227 3.1 Characteristics of the study sample

228 Table 1 shows the characteristics for the study sample from the BLSA. Two-sided t-tests show  
229 that bivariate partial correlations of vestibular function and vision/proprioception function are  
230 insignificant ( $p < 0.05$ ) while controlling for age (Table 2). Additionally, the bivariate corre-  
231 lation between hearing and vestibular functions was significant while controlling for age ( $p =$   
232  $0.042$ ), but fell below significance when additionally controlling for gender ( $\rho = -0.19$  ( $p =$   
233  $0.066$ )).

Table 1: Characteristics of the study sample, presented on their original scale (N = 117). Key: PTA: four-frequency (0.5, 1, 2, 4 kHz) pure tone average from the better ear; n: the number of participants with a visit where both the characteristic and MRI data were available; %:  $100(n/N)$  percent; SD: standard deviation.

| Characteristic                     | Mean (SD)    | N (%)     |
|------------------------------------|--------------|-----------|
| Age (years)                        | 77 (8.7)     |           |
| Sex                                |              |           |
| Male                               |              | 79 (67.5) |
| Female                             |              | 38 (32.5) |
| Education (Years)                  | 17.1 (2.5)   |           |
| Best Corrected cVEMP Amplitude     | 1.2 (0.75)   |           |
| Best oVEMP Amplitude ( $\mu$ V)    | 13.6 (10.1)  |           |
| Mean VOR Gain                      | 0.997 (0.16) |           |
| Best Four Frequency PTA (dB)       | 32 (14.9)    |           |
| Visual Acuity (logMAR)             | 0.11 (0.13)  |           |
| Proprioception Threshold (degrees) | 1.71 (1.73)  |           |

Table 2: Bivariate Pearson partial correlation coefficients, with p-values in parentheses, between vestibular and multi-sensory function (N = 117). Key: PTA: four-frequency (0.5, 1, 2, 4 kHz) pure tone average from the better ear; †: Variables marked with a dagger (†) have been negated such that increasing values indicate better function; \*:  $p < 0.05$ .

|                           | Best Corrected cVEMP Amplitude | Best oVEMP Amplitude | Mean VOR Gain |
|---------------------------|--------------------------------|----------------------|---------------|
| Best Four Frequency PTA†  | -0.21 (0.042 *)                | -0.00014 (1.0)       | 0.11 (0.25)   |
| Visual Acuity†            | 0.11 (0.31)                    | -0.064 (0.54)        | 0.0050 (0.97) |
| Proprioception Threshold† | -0.060 (0.57)                  | -0.13 (0.20)         | -0.090 (0.36) |

### 234 3.2 Vestibular effects on prefrontal and sensorimotor cortex morphology

235 Figures 3, 4, and 5 illustrate the spatial distribution of the significant vestibular-only effects  
236 from the alternative hypothesis  $H_1$  and of the significant vestibular effects from the alternative  
237 hypothesis  $H_2$  which additionally covaried for hearing, vision, or proprioception function. Adding  
238 hearing function to the model reduced the saccular and canal, but not utricular, function model

239 sample sizes from 95 and 107 subjects to 94 and 106 subjects, respectively. Adding vision  
240 function reduced the saccular, utricular, and canal function model sample sizes from 95, 100,  
241 and 107 subjects to 90, 95, and 100 subjects, respectively. The addition of proprioception  
242 function reduced the saccular and canal, but not utricular, function model sample sizes from 95  
243 and 107 subjects to 94 and 106 subjects, respectively.

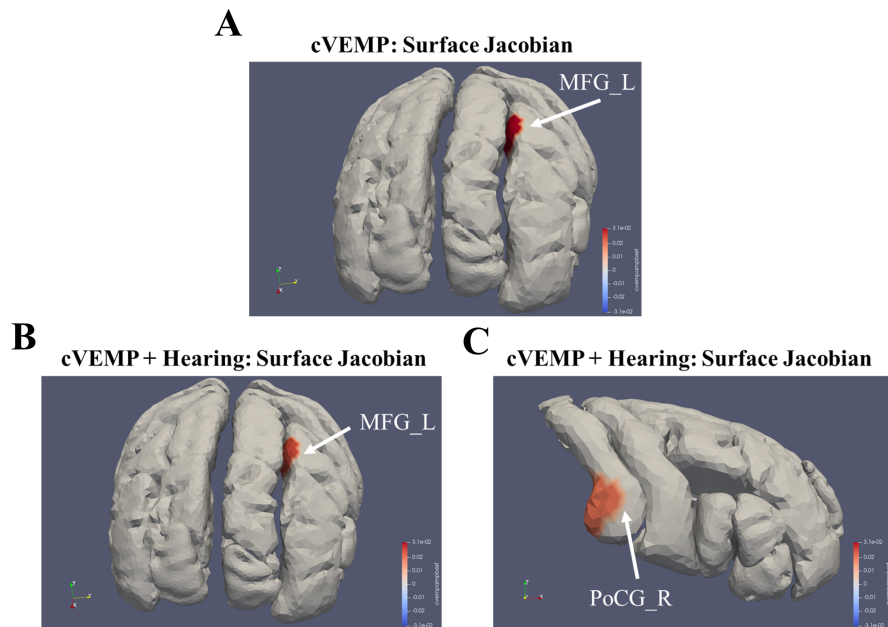

Figure 3: **Spatial distribution of the significant saccular effects on the shapes of the frontal and sensorimotor cortices visualized on the population template.** (A) shows the saccular-only results, and (B,C) show the saccular-hearing results. Regions that are colored red (blue) indicate a significant surface expansion (compression) in the direction tangent to the surface (surface Jacobian) with higher saccular function. *MFG*, posterior pars of middle frontal gyrus, *PoCG*, postcentral gyrus of the sensorimotor cortex.

### 244 3.2.1 Prefrontal cortex

245 In the vestibular-only analyses, several relationships between vestibular end-organ function and  
246 surface shape alterations in the prefrontal cortex were significant according to permutation  
247 testing. A 1 standard deviation (SD) increase in saccular function was associated with a 0.031%  
248 expansion tangent to the cortical surface in the medial left posterior MFG ( $p \approx 0.04$ , CI: (-  
249 0.028, 0.091)). A 1SD increase in utricular function was associated with a 0.008% expansion  
250 tangent to the cortical surface in the medial left posterior MFG ( $p \approx 0.018$ , CI: (-0.048, 0.064)),  
251 a 0.009% compression normal to the cortical surface in the rostral lateral region of the left  
252 SFG ( $p \approx 0.047$ , CI: (-0.041, 0.023)), a 0.023% compression normal to the cortical surface in  
253 the caudal dorsal region of the left SFG\_pole ( $p \approx 0.0019$ , CI: (-0.054, 0.007)), and a 0.027%

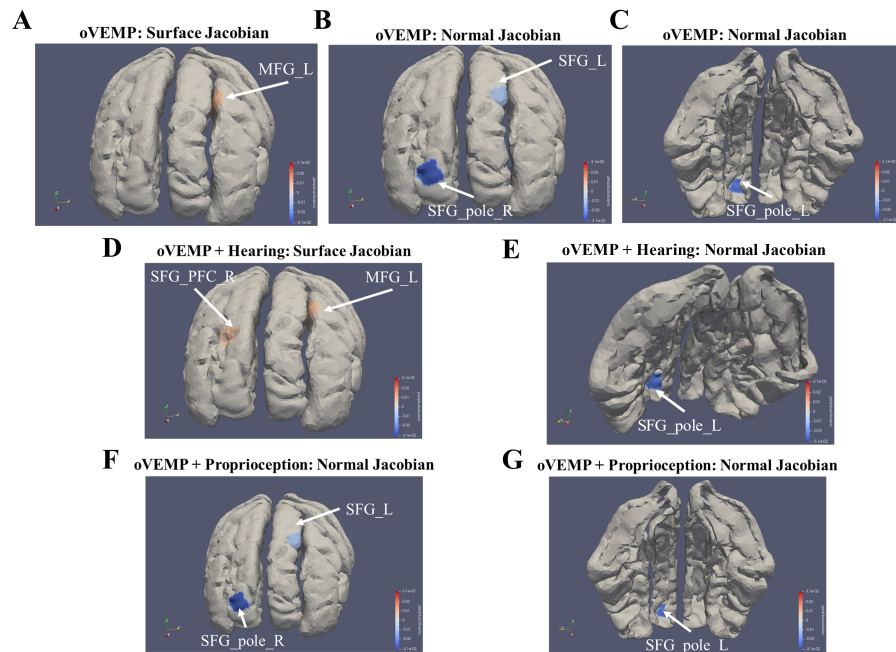

Figure 4: **Spatial distribution of the significant utricular effects on frontal cortex shape visualized on the population template.** (A-C) show the utricular-only results, (D,E) show the utricular-hearing results, and (F,G) show the utricular-proprioception results. Red (blue) indicates a region of significant surface expansion (compression) in the direction tangent/normal to the surface (surface/normal Jacobian) with higher utricular function. *MFG*, posterior pars of middle frontal gyrus, *SFG\_PFC*, the middle-superior part of the prefrontal cortex, *SFG\_pole*, frontal pole, and *SFG*, posterior pars of the superior frontal gyrus.

254 compression normal to the cortical surface in the dorsal region of the right *SFG\_pole* ( $p \approx 0.031$ ,  
 255 CI:  $(-0.060, 0.008)$ ). A 1SD increase in canal function was associated with a 0.008% expansion  
 256 tangent to the cortical surface in the medial rostral region of the left *SFG* ( $p \approx 0.034$ , CI:  $(-0.033$ ,  
 257  $0.050)$ ), a 0.008% expansion tangent to the cortical surface in the dorsal lateral region of the  
 258 right *SFG\_PFC* ( $p \approx 0.042$ , CI:  $(-0.037, 0.054)$ ), and a 0.018% expansion normal to the cortical  
 259 surface in the dorsal region of the right *SFG\_pole* ( $p \approx 0.035$ , CI:  $(-0.014, 0.052)$ ). Figures 3, 4,  
 260 and 5 show the spatial distribution of these associations.

261 In the multi-sensory analyses of otolith function, many relationships persisted and others were  
 262 found (See Figures 3, 4, and Supplementary Table 1). Figure 3B shows a 1SD increase in saccular  
 263 function was associated with a 0.025% expansion tangent to the cortical surface in the medial  
 264 left posterior *MFG* after accounting for hearing function ( $p \approx 0.0283$ , CI:  $(-0.007, 0.11)$ ). A 1SD  
 265 increase in saccular function was associated with a 0.025% expansion tangent to the cortical  
 266 surface in the medial left posterior *MFG* after accounting for hearing function ( $p \approx 0.0283$ , CI:  
 267  $(-0.007, 0.11)$ ) (See Figure 3B). In models additionally covarying for hearing function, a 1SD

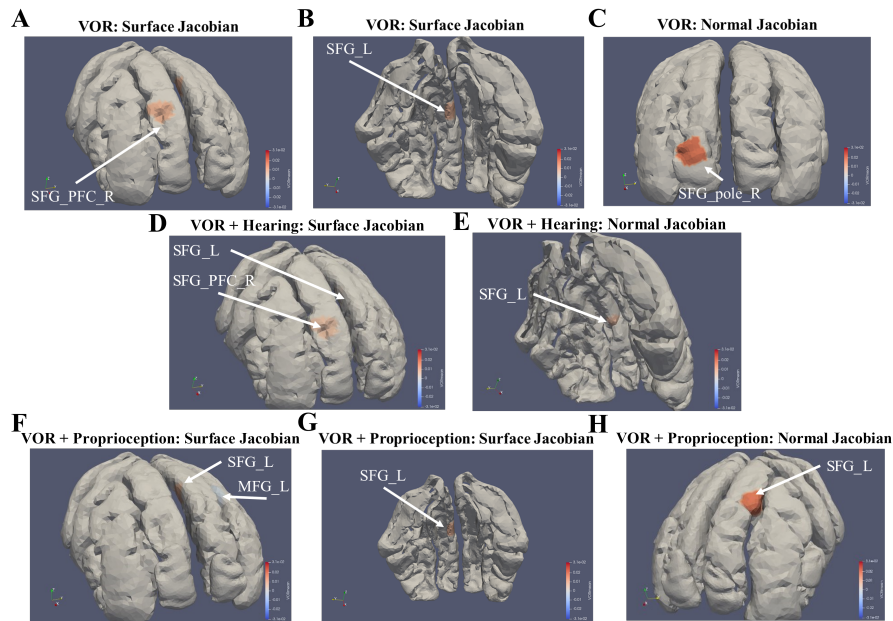

Figure 5: **Spatial distribution of the significant horizontal canal effects on frontal cortex shape visualized on the population template.** (A-C) show the utricular-only results, (D,E) show the utricular-hearing results, and (F-H) show the utricular-proprioception results. Red (blue) indicates a region of significant surface expansion (compression) in the direction tangent/normal to the surface (surface/normal Jacobian) with higher canal function. *MFG*, posterior pars of middle frontal gyrus, *SFG\_PFC*, the middle-superior part of the prefrontal cortex, *SFG\_pole*, frontal pole, and *SFG*, posterior pars of the superior frontal gyrus.

268 increase in utricular function was associated with a 0.008% expansion tangent to the cortical  
 269 surface in the medial left MFG ( $p \approx 0.0164$ , CI: (-0.038, 0.069)), a 0.006% expansion tangent to  
 270 the the dorsal lateral surface of the right SFG\_PFC ( $p \approx 0.0157$ , CI: (-0.055, 0.025)) (Figure 4D),  
 271 and a 0.023% compression normal to the caudal surface of the left SFG\_pole ( $p \approx 0.0025$ , CI:  
 272 (-0.021, 0.045)) (Figure 4D). In models additionally covarying for proprioceptive function, a 1SD  
 273 increase in utricular function was associated with a 0.014% compression normal to the cortical  
 274 surface in the rostral lateral left SFG ( $p \approx 0.0312$ , CI: (0.027, 0.105)), a 0.025% compression  
 275 normal to the cortical surface in the rostral dorsal left SFG\_pole ( $p \approx 0.0025$ , CI: (-0.026, 0.041)),  
 276 and a 0.031% compression normal to the caudal surface of left SFG\_pole ( $p \approx 0.037$ , CI: (-0.096,  
 277 -0.012)) (See Figures 4F and 4G).

278 In the multi-sensory analyses of canal function, many relationships persisted and numerous  
 279 others were found (See Figure 5 and Supplementary Table 1). Figures 5D and 5E show a 1SD  
 280 increase in canal function was associated with a 0.002% expansion tangent to the cortical sur-  
 281 face in the medial rostral region of the left SFG ( $p \approx 0.035$ , CI: (-0.043, 0.044)), a 0.007%  
 282 expansion normal to the cortical surface in the medial rostral region of the left SFG ( $p \approx 0.037$ ,

283 CI: (-0.02, 0.033)), and a 0.006% expansion tangent to the cortical surface in the dorsal lat-  
284 eral region of the right SFG\_PFC ( $p \approx 0.014$ , CI: (-0.042, 0.052)), after accounting for hearing  
285 function. In the canal-proprioception function models, a 1SD increase in canal function was as-  
286 sociated with a 0.003% compression tangent to the cortical surface in the medial left posterior  
287 MFG, a 0.008% expansion tangent to the cortical surface in the medial rostral region of the left  
288 SFG ( $p \approx 0.033$ , CI: (-0.025, 0.051)), and a 0.018% expansion normal to the cortical surface in  
289 the medial rostral region of the left SFG ( $p \approx 0.027$ , CI: (-0.011, 0.047)) (See Figures 5F, 5G, and  
290 5H).

291 No relationships between vestibular function and the shape of the inferior frontal gyrus (pars  
292 opercularis, pars triangularis, pars orbitalis), or the MFG\_DPFC survived permutation testing at  
293 the 0.05 level. Notably, these findings persist and more are uncovered after accounting for  
294 hearing function, vision function, and proprioceptive function in individual bivariate analyses  
295 (See Figures 3, 4, and 5 and Supplementary Table 1). Furthermore, all relationships between  
296 vestibular function and the shapes of the frontal and sensorimotor cortices were attenuated  
297 when correcting for vision function, but many relationships still showed strong trends in the left  
298 MFG (canal function:  $p \approx 0.066$ ), left SFG (canal function:  $p \approx 0.056$ ), and right SFG\_PFC (canal  
299 function:  $p \approx 0.087$ ). Moreover, we note several strong trends in the multisensory analyses that  
300 did not survive permutation testing at the 0.05 level (See Supplementary Table 1).

### 301 **3.2.2 Sensorimotor cortex**

302 No relationships between vestibular function and the shape of the precentral gyrus or the post-  
303 central gyrus survived permutation testing at the 0.05 level (i.e. all  $p_{perm} \geq 0.05$ ) in the non-  
304 multi-sensory analysis. Importantly, a relationship was found after accounting for hearing func-  
305 tion, but not vision or proprioceptive function in separate bivariate analyses (See Figure 3C and  
306 Supplementary Table 1). Permutation testing revealed a significant relationship between saccu-  
307 lar function and tangent surface shape in the right poCG when additionally covarying for hearing  
308 function. Figure 3C shows that a 1SD increase in saccular function correlated with approximately  
309 0.020% expansion tangent to the cortical surface in the posterior ventrolateral surface of the  
310 right PoCG ( $p \approx 0.0242$ , CI: (-0.075, 0.010)). Despite not surviving permutation testing at the  
311 0.05 level, there were several strong trends in the multisensory analyses, in particular in the  
312 left PoCG (canal-vision function model:  $p \approx 0.079$ ), left PrCG (saccular-vision function model:

313  $p \approx 0.091$ ), and right PrCG (canal-proprioception function model:  $p \approx 0.1$ ) (See Supplementary  
314 Table 1).

## 315 **4 Discussion**

316 In this study of healthy, older adults, we found that reduced vestibular function is associated  
317 with shape alterations in ten ROIs of the putative prefrontal and sensorimotor "vestibular cor-  
318 tex". The ROIs investigated include the middle-superior part of the prefrontal cortex (SFG\_PFC),  
319 frontal pole (SFG\_pole), and posterior pars of the superior frontal gyrus (SFG), the dorsal pre-  
320 frontal cortex and posterior pars of middle frontal gyrus (MFG\_DPFC, MFG), the pars opercularis,  
321 pars triangularis, and pars orbitalis of the inferior frontal gyrus (IFG), as well as the precen-  
322 tral gyrus (PrCG) and postcentral gyrus (PoCG) of the sensorimotor cortex. Specifically, we  
323 found associations between reduced saccular function and significant cortical surface com-  
324 pression in the MFG, reduced utricular function and MFG compression and expansion of the  
325 SFG and SFG\_pole, respectively, and reduced canal function and surface compression of the  
326 SFG, SFG\_PFC, and SFG\_pole. After additionally adjusting for measures of hearing and propri-  
327 oception, we observed shape alterations in the MFG, SFG, SFG\_PFC, SFG\_pole, and PoCG with  
328 poorer end-organ functions. However, additionally adjusting for vision function attenuated the  
329 observed relationships, albeit they exhibited strong trends toward significance. This finding  
330 likely stems from a power loss resulting from a redistribution of explained variance, thereby  
331 reducing the vestibular-only effect size. Additionally, the loss of power is likely influenced by a  
332 small reduction in degrees of freedom (e.g. adding vision reduced the saccular, utricular, and  
333 canal function model sample sizes from 95, 100 and 107 subjects to 90, 95 and 100 subjects,  
334 respectively). This loss of power raises the detectable vestibular-only effect size for our sample  
335 size, and thus a larger sample size would be needed to detect vestibular effects in the presence  
336 of vision effects. Furthermore, a ceiling/floor effect of vision function could lead to overesti-  
337 mation of the vision effect, further exacerbating the issue with the detectable vestibular effect  
338 size. Importantly, given that vestibular and vision functions were insignificantly correlated, and  
339 a larger sample size would allow the vestibular-only effects to be revealed in the presence of  
340 vision function, we suspect that the relationship between vestibular function and local frontal  
341 cortex morphology is independent of vision function. The significant structures are known to  
342 exhibit robust activations to artificial and naturalistic vestibular stimulation as well as structural

343 alterations in aging and vestibular syndromes [66, 67, 68, 41, 34, 37, 39, 42]. Our findings align  
344 with previous links between vestibular function and the structures of the somatosensory [34,  
345 41, 42], motor [39, 41], and prefrontal cortices [37, 39, 41, 42] and clarify previous inconsistent  
346 reports [34, 35, 36, 37, 38, 39, 40, 41, 42].

#### 347 **4.1 Prefrontal cortex**

348 Our findings support the initial hypothesis that diminished vestibular function correlates with  
349 structural changes in the prefrontal cortex, largely independent of multisensory functions. Specif-  
350 ically, reductions in saccular and utricular functions are associated with surface compression  
351 in the medial left MFG, irrespective of auditory function. Additionally, decreased canal function  
352 correlates with compressions in the medial rostral region of the left SFG, independent of both  
353 hearing and proprioception functions, and in the dorsal lateral region of the right SFG\_PFC, in-  
354 dependent of hearing function alone. In the context of age-related auditory changes, reduced  
355 canal function is associated with compression in the most rostral medial region of the left SFG.  
356 Conversely, considering age-related proprioceptive changes, reduced canal function is linked to  
357 both an expansion in the rostral medial surface of the left MFG and a compression in the rostral  
358 lateral surface of the left SFG. Interestingly, the compressive effect on the dorsolateral sur-  
359 face of the right SFG\_PFC, associated with diminished utricular function, is insignificant when  
360 accounting for age-related hearing changes. Unexpectedly, reduced utricular function is also  
361 associated with expansions in the rostral lateral region of the left SFG, the caudal dorsal region  
362 of the left SFG\_pole, and the rostral dorsal region of the right SFG\_pole, independent of propri-  
363 oceptive functions. These expansions, which may reflect age-related alterations in vestibular  
364 sensitivity, are moderated by auditory function, as evidenced by attenuations in the expansions  
365 of the right SFG\_pole and left SFG [69, 70].

366 The MFG and SFG, which contain the premotor cortex, supplementary motor area, and frontal  
367 eye fields, are crucial for motor control, planning, and initiating visuospatial movements. These  
368 regions are interconnected with various brain regions, including other prefrontal areas, pre-  
369 motor, cingulate, somatosensory, and insular regions, facilitating the coordination of working  
370 memory for actions and complex planning sequences [71]. Vestibular inputs to these areas, sup-  
371 ported by animal and human studies, suggest significant vestibular influence on regions near  
372 the frontal eye fields and the supplementary motor area [1, 72, 73]. Evidence from subclinical and



373 clinical studies further suggests that vestibular impairments correlate with structural changes in  
374 these cortical areas, emphasizing their role in vestibular processing [41, 37, 39]. Moreover, the  
375 frontal pole's extensive connectivity and role in episodic memory (lateral subregion) and cogni-  
376 tive switching (anterior medial subregion) suggest its critical involvement in managing deficits  
377 in cognitive-motor dual-tasking observed in vestibular patients [74, 75, 76, 77]. Despite no de-  
378 tected relationship in the literature at the time of writing between dual-task gait performance  
379 and the SFG\_pole [78], we speculate that the frontal pole utilizes utricle-and canal-transduced  
380 linear and angular acceleration data to coordinate complex body and visuo-motor actions (e.g.  
381 locomotion, reaching, and grasping) while balancing various cognitive, interoceptive, and emo-  
382 tional demands.

383 Unexpectedly, no significant correlations were found between vestibular function and the shapes  
384 of the pars opercularis, pars orbitalis, and pars triangularis of the inferior frontal gyrus, or the  
385 MFG\_DPF. This absence of expected correlations, despite extensive literature highlighting the  
386 involvement of these areas in vestibular processing [66], suggests two possible explanations.  
387 The first is that we may be more likely to detect volume-based, or cortical thickness-based  
388 changes in these regions. The second is that there are potential compensatory mechanisms  
389 within the brain that adjust to age-related changes in vestibular sensitivity [69, 70]. Further-  
390 more, the peripheral vestibular information processed through thalamic-limbic-striatal-frontal  
391 circuits likely integrates with multi-sensorimotor data before reaching the prefrontal cortex. This  
392 integration could explain the lack of observed structural changes as compensatory adaptations  
393 or differential sensitivities to combined sensory inputs, influenced by aging and neuroplastic-  
394 ity. Together, an age-related and multi-sensory involvement could explain how these regions  
395 respond to otolith or canal information and show no relationship with structural alterations (and  
396 language function [79, 80]) in older adults. Overall, our results underscore a significant link  
397 between age-related declines in vestibular function and morphological variations in the frontal  
398 cortex, suggesting a broader impact of sensory integration on cognitive and motor functions in  
399 older adults [29, 81, 82, 83].

## 400 **4.2 Sensorimotor cortex**

401 It is unclear why, in the vestibular-only analysis, there were no associations of saccular, utric-  
402 ular, or horizontal semi-circular canal function with the PrCG or PoCG in either hemisphere,

403 given these regions are implicated in the vestibular cognitive network [6, 1, 5, 3]. It may be  
404 the case that we are more likely to detect changes in volume or thickness in these regions.  
405 However, in the multi-sensory analysis, reduced saccular function correlated with compression  
406 in the posterior ventrolateral region of the right PoCG when accounting for age-related hearing  
407 loss. Previous studies of vestibular stimulation reported robust neural responses in the primary  
408 and secondary somatosensory cortex in rats [84] and in humans [1]. Because the posterior ven-  
409 trolateral region of the right PoCG may contain the representation of the mouth and larynx, it is  
410 connected with the multi-sensorimotor speech and language network (e.g. the supramarginal  
411 gyrus), and speech activates both the auditory and vestibular systems [85, 86, 87], this finding  
412 may imply the importance of saccular and hearing function in the context of speech planning  
413 and execution. We speculate that this finding may also be important for self-other voice dis-  
414 crimination, which relies on auditory, somatosensory (e.g. bone-conducted vibration signals,  
415 mouth proprioception), and vestibular processing [86, 87] by the PoCG. Additionally, the con-  
416 nectivity of the posterior ventrolateral region of the PoCG, approximately corresponding to BA  
417 1 and BA 2, with key vestibular network regions (e.g. the insula) implies an important role more  
418 broadly in somatosensation, bodily self-consciousness and control, and motor planning which  
419 involves self-motion perception, and social cognition [32, 33, 71, 88, 89].

420 Whether the PoCG may use information about linear acceleration of the head in the horizontal  
421 plane transduced by the utricle or about angular acceleration of the head in the horizontal plane  
422 (yaw) transduced by the horizontal semi-circular canal must be elucidated. Older adults with  
423 reduced vestibular function as measured by the standing on foam with eyes closed balance  
424 (FOEC) test (i.e. more sway) were observed to have poorer sensorimotor cortex structure [41].  
425 This is important as one study of older adults found that age-related horizontal canal dysfunction  
426 is associated with decreased performance on the FOEC test [90]. Additionally, older adults  
427 were observed to have significantly shallower sulcal depth (i.e. worse brain structure) in the  
428 the sensorimotor, supramarginal, insular, and superior frontal and parietal cortices with poorer  
429 dual-gait performance [78].

### 430 **4.3 Strengths of this study**

431 We report several strengths of this study. One such strength is that the relationships ex-  
432 amined were hypotheses-driven based on converging evidence from structural and functional

433 neuroimaging in humans. A second strength is that we use a state-of-the-art brain mapping  
434 pipeline. This pipeline utilizes a study-appropriate multi-atlas and LDDMM, a well-established  
435 framework of non-linear image registration techniques [91]. Moreover, we employed LDDMM-  
436 based surface diffeomorphometry to overcome the limitations encountered by other vestibular  
437 neuroimaging studies that used low-strength MRI, voxel-based morphometry, or volume-based  
438 morphometry, such as the tendency to miss effects that are subtle, non-focal, or non-uniformly  
439 spatially distributed across the region of interest [92]. Surface diffeomorphometry provides  
440 a sensitive measure of cortical shape variation and has been used to track sub-voxel struc-  
441 tural alterations in aging and disease [43, 55, 56, 57, 58, 59, 60, 61]. A third strength is that  
442 our quality control pipeline involved manual inspections of the data at each step of processing.  
443 Also, our statistical testing pipeline accounts for multiple comparisons as well as for outliers us-  
444 ing permutation testing and bootstrapping, respectively. In contrast to vestibular neuroimaging  
445 studies that stimulate the end-organs in a combination of ways (e.g. galvanic vestibular stimula-  
446 tion; caloric stimulation), we use individual measurements of the utricle, saccule, and horizontal  
447 semi-circular canal to capture end-organ specific relationships with brain morphology. This is  
448 important for aging studies because the hair cells in the cristae of the semi-circular canals de-  
449 cline with age earlier than those of the otolithic maculae. Thus, their individual contributions  
450 to the aging of the central vestibular pathways may be different. We also used specific clinical  
451 assessments of hearing, vision, and proprioception function to determine multi-sensory involve-  
452 ment, rather than use a composite clinical test based on gait or balance/posturography.

#### 453 **4.4 Limitations of this study**

454 We note several limitations to this study. While cortical surface shape analysis provides sensi-  
455 tive measures morphology, it only describes how the surface is altered. Thus, structural changes  
456 within the structure of interest are missed. While volume measures the size of the broader  
457 structure and complements the local shape measures when the changes are uniform across  
458 (not within) the structure, cortical thickness may provide a complementary sensitive measure of  
459 cortical morphology, and when paired with equivolumetric theory, can describe what happens  
460 within each structure of interest in terms of layer thicknesses [93]. The normal Jacobian mea-  
461 sure used in this study is qualitatively different than a cortical thickness measure, which is often  
462 defined as the length of a streamline connecting two opposing points on the cortical ribbon.  
463 Recent studies have highlighted the importance of cortical microarchitecture and layer-specific

464 relationships in cognitive networks [94]. The small local changes in shape could be compen-  
465 sated for by shape changes in the other direction in the rest of the broader structure (even if  
466 the latter changes are each non-significant). This has been shown before in studies of children  
467 with ADHD in whom basal ganglia volume changes in some cases conflicted with the direction  
468 of local shape changes [95, 96].

469 Notably, the reproducibility of findings is a challenge for several reasons. Anatomical definitions  
470 can vary between atlases and experts, adding to the great variability in appearance of cortical  
471 parcels at high granularity. The quality and smoothness of surface triangulations, as well as the  
472 choice of surface mapping algorithm parameters, also may impact the results. The surface clus-  
473 tering approach may impact the results. The choice of number of surface clusters determines  
474 the spatial extent of the cluster, which implicitly corresponds to an assumption about the size  
475 of the region related to the effect. In this study, we chose the number of clusters to balance  
476 the number of patches, and therefore the number of comparisons, and the spatial extent of the  
477 effects. To consider a continuum of surface cluster sizes, a threshold-free cluster enhancement  
478 procedure for surfaces could be developed. Additionally, the boundaries of the clusters may  
479 overlap regions where the true effect lies and noise in such a way to mask the true effect. More-  
480 over, our population templates are created based on this particular sample; thus, they would  
481 be different when creating a new population template based on a different sample. Although  
482 the test statistic we used was based on maximum squared errors, which is generally less robust  
483 than the sum of squared errors, it is a conservative approach typically employed in our group.  
484 This approach is conservative because it compares our results to the least favorable outcome,  
485 rather than average outcomes, under permuted vestibular function. Due to our nonparametric  
486 testing procedure, the validity of our p-values is independent of the data distribution and of our  
487 choice of test statistic, whereas the power of the tests is dependent.

488 Although our large multi-atlas set spans our investigated age range to capture the anatomical  
489 variability of adult brains, this multi-atlas set lacks modern cytoarchitectonic definitions that  
490 have relevance to brain function. Another limitation is that we did not examine the potential role  
491 of the cerebellum, the brainstem, the hypothalamus, or the thalamus in modulating the effects of  
492 age-related vestibular loss in the cortex. However, robust measures of cerebellar and brainstem  
493 structures are being developed. While we did reuse data, we did not account for dataset decay  
494 [97] because we explored a distinct research question compared to previous studies from our

495 group that use this cohort and measurements [43, 44]. This may limit the strength of our  
496 findings, and future confirmatory studies may be needed to reinforce our findings. Additionally,  
497 our findings may not generalize to the broader and younger population due to the age range  
498 used in this study and the propensity of BLSA participants to have higher levels of education  
499 and socioeconomic status than typical adults. These are important caveats to the interpretation  
500 of our findings, as higher education and socioeconomic status may be associated with frontal  
501 and sensorimotor structure. Finally, these results may not generalize to younger adults who have  
502 weakened vestibular function.

#### 503 **4.5 Future work**

504 To understand the neuroanatomical underpinnings of aging on vestibular-mediated behaviors,  
505 several studies will be needed. Longitudinal studies incorporating gray matter volume, shape,  
506 and cortical thickness and white matter microstructural integrity of the limbic system, temporo-  
507 parietal junction, and frontal cortex will help to understand the relationships over time. Because  
508 the brain vestibular network is plastic and compensates for vestibular loss to maintain behav-  
509 ioral function, we aim to use changepoint analysis to identify subtle non-linearities in the trends  
510 of brain structure alterations that may be missed by gross aging trends [98]. Then a prece-  
511 dence graph can be created that highlights the sequence of regional structural changes in  
512 relation to each other. To investigate causal hypotheses between vestibular loss and structural  
513 changes in the multi-sensorimotor vestibular network, our group plans to use longitudinal struc-  
514 tural equation modeling that accounts for possible confounding by multi-sensorimotor function.  
515 Notably, structural equation modeling can test hypotheses regarding the relationship between  
516 vestibular-mediated behaviors and intermedating brain regions (e.g. brainstem, hypothalamus,  
517 cerebellum, thalamus). By harmonizing our atlas definitions with modern brain atlases based  
518 on cytoarchitecture [99, 100] or multi-modal parcellations [100, 101, 102], new insights into  
519 structure-function relationships can be gleaned. Altogether, this future work can reveal the  
520 sequence and causal direction of changes in the multi-sensorimotor vestibular network.

## 521 **5 Conclusion**

522 Our findings highlight subtle associations between age-associated vestibular loss and the struc-  
523 ture of the frontal cortex—a key region in the vestibular cognitive network that receives multi-

524 sensorimotor vestibular information—in-line with previous neuroimaging studies of vestibular  
525 function. Furthermore, these findings may provide the neuroanatomical links between vestibular  
526 lar loss and higher-order cognitive deficits observed in the aging population and in people with  
527 dementia or Parkinson’s disease. Future work will need to determine the temporal and spatial  
528 flow of structural alterations in brain regions that receive vestibular information and that are  
529 involved in vestibular-mediated behaviors, such as self-motion perception, motor planning, and  
530 executive function. Bolstering the understanding of the involvement of peripheral and central  
531 vestibular loss in self-motion perception, motor planning, and executive function will be vital for  
532 the development of sensible interventions.

### 533 **Acknowledgments**

534 This work was supported by the National Institute on Aging (Grant R01 AG057667), the National  
535 Institute on Deafness and Other Communication Disorders (Grant R03 DC015583), and the  
536 National Institute of Biomedical Imaging and Bioengineering (Grant P41-EB031771).

### 537 **Conflict of interest**

538 The authors report no conflicts of interest.

### 539 **Data availability statement**

540 The BLSA data are available upon request on the BLSA website ([blsa.nih.gov](https://blsa.nih.gov)). Requests undergo  
541 a review by the BLSA Data Sharing Proposal Review Committee and approval from the NIH  
542 Institutional Review Board.

### 543 **Supporting Information**

544 See the Supplementary Material.

## 545 6 Supplementary Material

Supplementary Table 1: Significant and strongly trending results of the multisensory regression models, in which hearing, vision, and proprioception function were included as covariates. A tangent expansion (compression) corresponds to a positive (negative) log-surface Jacobian, and similarly for a normal expansion (compression) and a positive (negative) log-normal Jacobian. Key: MFG: posterior middle frontal gyrus; SFG: posterior superior frontal gyrus; SFG\_PFC: prefrontal cortex part of the superior frontal gyrus; SFG\_pole: frontal pole of the superior frontal gyrus; PrCG: precentral gyrus; PoCG: postcentral gyrus; CI: confidence interval; \*\*  $p < 0.01$ , \*  $p < 0.05$

| Vestibular Function | Structure  | Deformation Direction | Sensory Covariate | p-value ( $p_{perm}$ ) | Magnitude (%) | 95% CI (%)      |
|---------------------|------------|-----------------------|-------------------|------------------------|---------------|-----------------|
| Saccular            | Left MFG   | Tangent expansion     | Hearing           | 0.028*                 | 0.025         | (-0.0074, 0.11) |
|                     | Right PoCG | Tangent expansion     | Hearing           | 0.024*                 | 0.020         | (-0.016, 0.057) |
|                     | Left PrCG  | Tangent               | Vision            | 0.091                  | -             | -               |
| Utricular           | Left MFG   | Tangent expansion     | Hearing           | 0.016*                 | 0.008         | (-0.038, 0.069) |

Continued on next page

**Table 1 continued from previous page**

| <b>Vestibular Structure Function</b> | <b>Deformation Direction</b> | <b>Sensory Covariate</b> | <b>p-value (<math>p_{perm}</math>)</b> | <b>Magnitude (%)</b> | <b>95% CI (%)</b> |                 |
|--------------------------------------|------------------------------|--------------------------|----------------------------------------|----------------------|-------------------|-----------------|
| Right SFG_PFC                        | Tangent expansion            | Hearing                  | 0.016*                                 | 0.006                | (-0.045, 0.056)   |                 |
| Left SFG_pole                        | Normal compression           | Hearing                  | 0.0027**                               | 0.023                | (-0.053, 0.007)   |                 |
| Right SFG_pole                       | Normal                       | Hearing                  | 0.061                                  | -                    | -                 |                 |
| Left SFG_pole                        | Normal compression           | Proprioception           | 0.0025**                               | 0.025                | (-0.056, 0.007)   |                 |
| Right SFG_pole                       | Normal compression           | Proprioception           | 0.037*                                 | 0.031                | (-0.065, 0.004)   |                 |
| Left SFG                             | Normal compression           | Proprioception           | 0.031*                                 | 0.014                | (-0.045, 0.02)    |                 |
| Right SFG                            | Normal                       | Proprioception           | 0.09                                   | -                    | -                 |                 |
| Horizontal Canal                     | Right SFG_PFC                | Tangent expansion        | Hearing                                | 0.014*               | 0.006             | (-0.042, 0.052) |
|                                      | Left MFG                     | Tangent compression      | Proprioception                         | 0.048*               | 0.003             | (-0.054, 0.042) |

Continued on next page



**Table 1 continued from previous page**

| <b>Vestibular Structure<br/>Function</b> | <b>Deformation<br/>Direc-<br/>tion</b> | <b>Sensory Covariate</b> | <b>p-value<br/>(<math>p_{perm}</math>)</b> | <b>Magnitude<br/>(%)</b> | <b>95% CI (%)</b> |
|------------------------------------------|----------------------------------------|--------------------------|--------------------------------------------|--------------------------|-------------------|
| Left SFG                                 | Tangent<br>expan-<br>sion              | Proprioception           | 0.033*                                     | 0.008                    | (-0.035, 0.051)   |
| Left SFG                                 | Normal<br>expan-<br>sion               | Proprioception           | 0.027*                                     | 0.018                    | (-0.011, 0.047)   |
| Right<br>SFG_PFC                         | Tangent                                | Proprioception           | 0.068                                      | -                        | -                 |
| Right<br>SFG_pole                        | Normal                                 | Proprioception           | 0.051                                      | -                        | -                 |
| Right<br>PrCG                            | Normal                                 | Proprioception           | 0.1                                        | -                        | -                 |
| Left MFG                                 | Tangent                                | Vision                   | 0.066                                      | -                        | -                 |
| Left SFG                                 | Tangent                                | Vision                   | 0.056                                      | -                        | -                 |
| Right<br>SFG_PFC                         | Tangent                                | Vision                   | 0.087                                      | -                        | -                 |
| Left PoCG                                | Normal                                 | Vision                   | 0.079                                      | -                        | -                 |

## 546 **References**

- 547 [1] Christophe Lopez and Olaf Blanke. “The thalamocortical vestibular system in animals  
548 and humans”. In: *Brain Research Reviews* 67.1 (June 2011), pp. 119–146. DOI: [10.1016/  
549 j.brainresrev.2010.12.002](https://doi.org/10.1016/j.brainresrev.2010.12.002). URL: [https://www.clinicalkey.es/playcontent/1-  
550 s2.0-S0165017311000026](https://www.clinicalkey.es/playcontent/1-s2.0-S0165017311000026).
- 551 [2] Julian Conrad, Bernhard Baier, and Marianne Dieterich. “The role of the thalamus in the  
552 human subcortical vestibular system<sup>1</sup>”. In: *Journal of Vestibular Research* 24.5-6 (2014),  
553 p. 375. DOI: [10.3233/VES-140534](https://doi.org/10.3233/VES-140534).
- 554 [3] C. De Waele et al. “Vestibular projections in the human cortex”. In: *Experimental brain  
555 research* 141.4 (Dec. 2001), pp. 541–551. DOI: [10.1007/s00221-001-0894-7](https://doi.org/10.1007/s00221-001-0894-7). URL:  
556 <https://www.ncbi.nlm.nih.gov/pubmed/11810147>.
- 557 [4] Ria Maxine Ruehl et al. “The human egomotion network”. In: *NeuroImage* 264 (2022).  
558 DOI: [10.1016/j.neuroimage.2022.119715](https://doi.org/10.1016/j.neuroimage.2022.119715).
- 559 [5] Martin Hitier, Stephane Besnard, and Paul F. Smith. “Vestibular pathways involved in  
560 cognition”. In: *Frontiers in Integrative Neuroscience* 8 (July 2014), p. 59. DOI: [10.3389/  
561 fnint.2014.00059](https://doi.org/10.3389/fnint.2014.00059). URL: <https://www.ncbi.nlm.nih.gov/pubmed/25100954>.
- 562 [6] Elisa Raffaella Ferrè and Patrick Haggard. “Vestibular cognition: State-of-the-art and  
563 future directions”. In: *Cognitive neuropsychology* 37.7-8 (Nov. 2020), pp. 413–420. DOI:  
564 [10.1080/02643294.2020.1736018](https://doi.org/10.1080/02643294.2020.1736018). URL: [https://www.tandfonline.com/doi/abs/  
565 10.1080/02643294.2020.1736018](https://www.tandfonline.com/doi/abs/10.1080/02643294.2020.1736018).
- 566 [7] Aisha Harun et al. “Vestibular Impairment in Dementia”. In: *Otology & Neurotology* 37.8  
567 (2016), pp. 1137–1142. DOI: [10.1097/MAO.0000000000001157](https://doi.org/10.1097/MAO.0000000000001157).
- 568 [8] Eric X. Wei et al. “Vestibular Loss Predicts Poorer Spatial Cognition in Patients with  
569 Alzheimer’s Disease”. In: *Journal of Alzheimer’s Disease* 61.3 (Jan. 2018), p. 995. DOI:  
570 [10.3233/JAD-170751](https://doi.org/10.3233/JAD-170751).
- 571 [9] Eric X. Wei et al. “Saccular Impairment in Alzheimer’s Disease Is Associated with Driving  
572 Difficulty”. In: *Dementia and Geriatric Cognitive Disorders* 44.5-6 (Jan. 2019), p. 294.  
573 DOI: [10.1159/000485123](https://doi.org/10.1159/000485123).

- 574 [10] Kevin Biju et al. “Vestibular Function Predicts Balance and Fall Risk in Patients with  
575 Alzheimer’s Disease”. In: *Journal of Alzheimer’s disease* 86.3 (Jan. 2022), pp. 1159–1168.  
576 DOI: [10.3233/JAD-215366](https://doi.org/10.3233/JAD-215366). URL: <https://www.ncbi.nlm.nih.gov/pubmed/35180117>.
- 577 [11] Graham D. Cochrane et al. “Cognitive and Central Vestibular Functions Correlate in  
578 People With Multiple Sclerosis”. In: *Neurorehabilitation and Neural Repair* 35.11 (2021),  
579 p. 1030. DOI: [10.1177/15459683211046268](https://doi.org/10.1177/15459683211046268).
- 580 [12] Udo Rüb et al. “Huntington’s Disease (HD): Degeneration of Select Nuclei, Widespread  
581 Occurrence of Neuronal Nuclear and Axonal Inclusions in the Brainstem”. In: *Brain*  
582 *Pathology* 24.3 (Mar. 2014), p. 247. DOI: [10.1111/bpa.12115](https://doi.org/10.1111/bpa.12115).
- 583 [13] Paul F Smith. “Vestibular functions and Parkinson’s disease”. In: *Frontiers in neurology*  
584 9 (2018), p. 427861.
- 585 [14] Wenqi Cui, Zhenghao Duan, and Juan Feng. “Assessment of Vestibular-Evoked Myogenic  
586 Potentials in Parkinson’s Disease: A Systematic Review and Meta-Analysis”. In: *Brain*  
587 *sciences* 12.7 (July 2022), p. 956. DOI: [10.3390/brainsci12070956](https://doi.org/10.3390/brainsci12070956). URL: [https://  
588 search.proquest.com/docview/2693939246](https://search.proquest.com/docview/2693939246).
- 589 [15] Sandra Carpinelli et al. “Distinct Vestibular Evoked Myogenic Potentials in Patients With  
590 Parkinson Disease and Progressive Supranuclear Palsy”. In: *Frontiers in Neurology* 11  
591 (Feb. 2021). DOI: [10.3389/fneur.2020.598763](https://doi.org/10.3389/fneur.2020.598763).
- 592 [16] Nicolaas I. Bohnen et al. “Decreased vestibular efficacy contributes to abnormal bal-  
593 ance in Parkinson’s disease”. In: *Journal of the Neurological Sciences* 440 (Sept. 2023).  
594 ISSN: 0022-510X. DOI: [10.1016/j.jns.2022.120357](https://doi.org/10.1016/j.jns.2022.120357).
- 595 [17] Güler Berkiten et al. “Assessment of the Clinical Use of Vestibular Evoked Myogenic  
596 Potentials and the Video Head Impulse Test in the Diagnosis of Early-Stage Parkinson’s  
597 Disease”. In: *Annals of Otology, Rhinology & Laryngology* 132.1 (2023), pp. 41–49.
- 598 [18] Jeong-Ho Park and Suk Yun Kang. “Dizziness in Parkinson’s disease patients is asso-  
599 ciated with vestibular function”. In: *Scientific Reports* 11.1 (Sept. 2021). DOI: [10.1038/  
600 s41598-021-98540-5](https://doi.org/10.1038/s41598-021-98540-5).
- 601 [19] Jeong Ho Park, Min Seung Kim, and Suk Yun Kang. “Initial Vestibular Function May Be  
602 Associated with Future Postural Instability in Parkinson’s Disease”. In: *Journal of Clinical*  
603 *Medicine* 11.19 (Sept. 2022). DOI: [10.3390/jcm11195608](https://doi.org/10.3390/jcm11195608).

- 604 [20] Nathalie Chastan et al. “Prediagnostic markers of idiopathic Parkinson’s disease: Gait,  
605 visuospatial ability and executive function”. In: *Gait & Posture* 68 (Feb. 2019), p. 500.  
606 ISSN: 0966-6362. DOI: [10.1016/j.gaitpost.2018.12.039](https://doi.org/10.1016/j.gaitpost.2018.12.039).
- 607 [21] Hans Engström, Björn Bergström, and Ulf Rosenhall. “Vestibular Sensory Epithelia”. In:  
608 *Archives of Otolaryngology* 100.6 (1974), pp. 411–418. DOI: [10.1001/archotol.1974.  
609 00780040425002](https://doi.org/10.1001/archotol.1974.00780040425002).
- 610 [22] U. Rosenhall. “Degenerative patterns in the aging human vestibular neuro-epithelia”. In:  
611 *Acta Oto-Laryngologica* 76.1-6 (1973), pp. 208–220.
- 612 [23] Steven D. Rauch et al. “Decreasing Hair Cell Counts in Aging Humans”. In: *Annals of  
613 the New York Academy of Sciences* 942.1 (2001), pp. 220–227. DOI: [10.1111/j.1749-  
614 6632.2001.tb03748.x](https://doi.org/10.1111/j.1749-6632.2001.tb03748.x).
- 615 [24] Lars-Göran Johnsson and Joseph E. Hawkins. “Sensory and Neural Degeneration with  
616 Aging, as Seen in Microdissections of the Human Inner Ear”. In: *Annals of Otolology,  
617 Rhinology & Laryngology* 81.2 (1972), pp. 179–193. DOI: [10.1177/000348947208100203](https://doi.org/10.1177/000348947208100203).
- 618 [25] E. Richter. “Quantitative study of human Scarpa’s ganglion and vestibular sensory ep-  
619 ithelia”. In: *Acta Oto-Laryngologica* 90.3-4 (1980), pp. 199–208.
- 620 [26] Robert W. Baloh and Vicente Honrubia. *Clinical neurophysiology of the vestibular system*.  
621 3rd ed. New York: Oxford University Press, 2001. ISBN: 0195139828.
- 622 [27] J. G. Colebatch, S. Govender, and S. M. Rosengren. “Two distinct patterns of VEMP  
623 changes with age”. In: *Clinical Neurophysiology* 124.10 (May 2013), p. 2066. ISSN: 1388-  
624 2457. DOI: [10.1016/j.clinph.2013.04.337](https://doi.org/10.1016/j.clinph.2013.04.337).
- 625 [28] Paul F. Smith. “The Growing Evidence for the Importance of the Otoliths in Spatial Mem-  
626 ory”. In: *Frontiers in Neural Circuits* 13 (2019). DOI: [10.3389/fncir.2019.00066](https://doi.org/10.3389/fncir.2019.00066).
- 627 [29] Robin T. Bigelow and Yuri Agrawal. “Vestibular involvement in cognition: Visuospatial  
628 ability, attention, executive function, and memory”. In: *Journal of Vestibular Research*  
629 25.2 (2015), p. 73. DOI: [10.3233/VES-150544](https://doi.org/10.3233/VES-150544).
- 630 [30] Kathleen E. Cullen. “The neural encoding of self-generated and externally applied move-  
631 ment: implications for the perception of self-motion and spatial memory”. In: *Frontiers  
632 in Integrative Neuroscience* 7 (2014), p. 108. DOI: [10.3389/fnint.2013.00108](https://doi.org/10.3389/fnint.2013.00108).

- 633 [31] Ryan M. Yoder and Jeffrey S. Taube. “The vestibular contribution to the head direction  
634 signal and navigation”. In: *Frontiers in integrative neuroscience* 8 (2014), p. 32. DOI: [10.3389/fnint.2014.00032](https://doi.org/10.3389/fnint.2014.00032). URL: <https://www.ncbi.nlm.nih.gov/pubmed/24795578>.
- 635
- 636 [32] Rachel E. Roditi and Benjamin T. Crane. “Suprathreshold asymmetries in human motion  
637 perception”. In: *Experimental Brain Research* 219.3 (2012), pp. 369–379. DOI: [10.1007/  
638 s00221-012-3099-3](https://doi.org/10.1007/s00221-012-3099-3).
- 639 [33] E. Anson et al. “Reduced vestibular function is associated with longer, slower steps  
640 in healthy adults during normal speed walking”. In: *Gait amp; posture* 68 (Feb. 2019),  
641 pp. 340–345. DOI: [10.1016/j.gaitpost.2018.12.016](https://doi.org/10.1016/j.gaitpost.2018.12.016). URL: [https://dx.doi.org/  
642 10.1016/j.gaitpost.2018.12.016](https://dx.doi.org/10.1016/j.gaitpost.2018.12.016).
- 643 [34] Katharina Hübner et al. “Gray Matter Atrophy after Chronic Complete Unilateral Vestibu-  
644 lar Deafferentation”. In: *Annals of the New York Academy of Sciences* 1164.1 (2009),  
645 p. 383. DOI: [10.1111/j.1749-6632.2008.03719.x](https://doi.org/10.1111/j.1749-6632.2008.03719.x).
- 646 [35] Peter Zu Eulenburg, Peter Stoeter, and Marianne Dieterich. “Voxel-based morphometry  
647 depicts central compensation after vestibular neuritis”. In: *Annals of Neurology* 68.2  
648 (2010), p. 241. DOI: [10.1002/ana.22063](https://doi.org/10.1002/ana.22063).
- 649 [36] Christoph Helmchen et al. “Structural Changes in the Human Brain following Vestibular  
650 Neuritis Indicate Central Vestibular Compensation”. In: *Annals of the New York Academy  
651 of Sciences* 1164.1 (2009), p. 104. DOI: [10.1111/j.1749-6632.2008.03745.x](https://doi.org/10.1111/j.1749-6632.2008.03745.x).
- 652 [37] Sung-Kwang Kwang Hong et al. “Changes in the gray matter volume during compensa-  
653 tion after vestibular neuritis: A longitudinal VBM study”. In: *Restorative Neurology and  
654 Neuroscience* 32.5 (2014), p. 663. DOI: [10.3233/RNN-140405](https://doi.org/10.3233/RNN-140405).
- 655 [38] Olympia Kremmyda et al. “Beyond Dizziness: Virtual Navigation, Spatial Anxiety and  
656 Hippocampal Volume in Bilateral Vestibulopathy”. In: *Frontiers in Human Neuroscience*  
657 10 (2016). DOI: [10.3389/fnhum.2016.00139](https://doi.org/10.3389/fnhum.2016.00139).
- 658 [39] Sebastian Wurthmann et al. “Cerebral gray matter changes in persistent postural per-  
659 ceptual dizziness”. In: *Journal of Psychosomatic Research* 103 (2017), p. 95. DOI: [10.  
660 1016/j.jpsychores.2017.10.007](https://doi.org/10.1016/j.jpsychores.2017.10.007).
- 661 [40] Martin Göttlich et al. “Hippocampal gray matter volume in bilateral vestibular failure”.  
662 In: *Human Brain Mapping* 37.5 (2016), p. 1998. DOI: [10.1002/hbm.23152](https://doi.org/10.1002/hbm.23152).

- 663 [41] K. E. Hupfeld et al. “Sensory system-specific associations between brain structure and  
664 balance”. In: *Neurobiology of Aging* 119 (Aug. 2022), p. 102. ISSN: 0197-4580. DOI: [10.1016/j.neurobiolaging.2022.07.013](https://doi.org/10.1016/j.neurobiolaging.2022.07.013).  
665
- 666 [42] Dominic Padova et al. “Vestibular Function is Associated with Prefrontal and Sensorimotor  
667 Cortical Gray Matter Volumes in a Cross-Sectional Study of Healthy, Older Adults”.  
668 In: *Aperture Neuro* 4 (2024).
- 669 [43] Athira Jacob et al. “Vestibular function and cortical and sub-cortical alterations in an  
670 aging population”. In: *Heliyon* 6.8 (Aug. 2020), e04728. DOI: [10.1016/j.heliyon.2020.e04728](https://doi.org/10.1016/j.heliyon.2020.e04728). URL: <https://dx.doi.org/10.1016/j.heliyon.2020.e04728>.  
671
- 672 [44] Rebecca Kamil et al. “Vestibular Function and Hippocampal Volume in the Baltimore  
673 Longitudinal Study of Aging (BLSA)”. In: *Otology & Neurotology* 39.6 (July 2018), pp. 765–  
674 771. ISSN: 1531-7129. DOI: [10.1097/MAO.0000000000001838](https://doi.org/10.1097/MAO.0000000000001838). URL: <http://ovidsp.ovid.com/ovidweb.cgi?T=JS&NEWS=n&CSC=Y&PAGE=fulltext&D=ovft&AN=00129492-201807000-00022>.  
675  
676
- 677 [45] Dominic M. Padova et al. “Linking vestibular function and sub-cortical grey matter volume  
678 changes in a longitudinal study of aging adults”. In: *ApertureNeuro* (2020). URL:  
679 [https://www.humanbrainmapping.org/files/Aperture%20Neuro/Accepted%20Works%20PDF/2\\_39\\_Padovaa\\_Linking\\_vestibular\\_function.pdf](https://www.humanbrainmapping.org/files/Aperture%20Neuro/Accepted%20Works%20PDF/2_39_Padovaa_Linking_vestibular_function.pdf).  
680
- 681 [46] Nathan Wetherill Shock. *Normal human aging: The Baltimore longitudinal study of aging*.  
682 84. US Department of Health and Human Services, Public Health Service, National ...,  
683 1984.
- 684 [47] S-U Ko et al. “Sex-specific age associations of ankle proprioception test performance in  
685 older adults: results from the Baltimore Longitudinal Study of Aging”. In: *Age and Ageing*  
686 44.3 (2015), p. 485. DOI: [10.1093/ageing/afv005](https://doi.org/10.1093/ageing/afv005).
- 687 [48] K. D. Nguyen et al. “Test-retest reliability and age-related characteristics of the ocular  
688 and cervical vestibular evoked myogenic potential tests”. In: *Otology Neurotology*  
689 31.5 (2010), p. 793. DOI: [10.1097/MAO.0b013e3181e3d60e](https://doi.org/10.1097/MAO.0b013e3181e3d60e). URL: <http://search.ebscohost.com/login.aspx?direct=true&db=rzh&AN=105039616&site=ehost-live&scope=site>.  
690  
691

- 692 [49] C. Li et al. “How to interpret latencies of cervical and ocular vestibular-evoked myogenic  
693 potentials: Our experience in fifty-three participants”. In: *Clinical Otolaryngology* 39.5  
694 (2014), p. 297. DOI: [10.1111/coa.12277](https://doi.org/10.1111/coa.12277). URL: <http://search.ebscohost.com/login.aspx?direct=true&db=asn&AN=98370966&site=ehost-live&scope=site>.  
695
- 696 [50] Carol Li et al. “Epidemiology of Vestibulo-Ocular Reflex Function”. In: *Otology & Neuro-*  
697 *tology* 36.2 (2015), p. 267. DOI: [10.1097/MAO.0000000000000610](https://doi.org/10.1097/MAO.0000000000000610).
- 698 [51] Yuri Agrawal et al. “Head Impulse Test Abnormalities and Influence on Gait Speed and  
699 Falls in Older Individuals”. In: *Otology amp; neurotology* 34.9 (Dec. 2013), pp. 1729–  
700 1735. DOI: [10.1097/MAO.0b013e318295313c](https://doi.org/10.1097/MAO.0b013e318295313c). URL: <https://www.ncbi.nlm.nih.gov/pubmed/23928523>.  
701
- 702 [52] Yuri Agrawal et al. “Evaluation of quantitative head impulse testing using search coils  
703 versus video-oculography in older individuals”. In: *Otology Neurotology* 35.2 (2014),  
704 p. 283. DOI: [10.1097/MAO.0b013e3182995227](https://doi.org/10.1097/MAO.0b013e3182995227). URL: <http://search.ebscohost.com/login.aspx?direct=true&db=rzh&AN=107881223&site=ehost-live&scope=site>.  
705
- 706 [53] Erich Schneider et al. “EyeSeeCam: An Eye Movement–Driven Head Camera for the Ex-  
707 amination of Natural Visual Exploration”. In: *Annals of the New York Academy of Sci-*  
708 *ences* 1164 (2009), p. 461. DOI: [10.1111/j.1749-6632.2009.03858.x](https://doi.org/10.1111/j.1749-6632.2009.03858.x). URL: <http://search.ebscohost.com/login.aspx?direct=true&db=asn&AN=40076453&site=ehost-live&scope=site>.  
709  
710
- 711 [54] Konrad P. Weber et al. “Impulsive Testing of Semicircular-Canal Function Using Video-  
712 oculography”. In: *Annals of the New York Academy of Sciences* 1164 (2009), p. 486.  
713 DOI: [10.1111/j.1749-6632.2008.03730.x](https://doi.org/10.1111/j.1749-6632.2008.03730.x). URL: <http://search.ebscohost.com/login.aspx?direct=true&db=asn&AN=40076497&site=ehost-live&scope=site>.  
714
- 715 [55] Laurent Younes, Marilyn Albert, and Michael I. Miller. “Inferring changepoint times of  
716 medial temporal lobe morphometric change in preclinical Alzheimer’s disease”. In: *Neu-*  
717 *roImage Clinical* 5 (2014), pp. 178–187. DOI: [10.1016/j.nicl.2014.04.009](https://doi.org/10.1016/j.nicl.2014.04.009).
- 718 [56] Michael I. Miller et al. “Amygdalar atrophy in symptomatic Alzheimer’s disease based on  
719 diffeomorphometry: the BIOCARD cohort”. In: *Neurobiology of Aging* 36 (2015), S3–S10.  
720 DOI: [10.1016/j.neurobiolaging.2014.06.032](https://doi.org/10.1016/j.neurobiolaging.2014.06.032).

- 721 [57] Anqi Qiu et al. “Regional shape abnormalities in mild cognitive impairment and Alzheimer’s  
722 disease”. In: *NeuroImage* 45.3 (2009), pp. 656–661. DOI: [10.1016/j.neuroimage.](https://doi.org/10.1016/j.neuroimage.2009.01.013)  
723 [2009.01.013](https://doi.org/10.1016/j.neuroimage.2009.01.013).
- 724 [58] Andreia V. Faria et al. “Linking white matter and deep gray matter alterations in pre-  
725 manifest Huntington disease”. In: *NeuroImage Clinical* 11 (2016), pp. 450–460. DOI:  
726 [10.1016/j.nicl.2016.02.014](https://doi.org/10.1016/j.nicl.2016.02.014).
- 727 [59] Anqi Qiu et al. “Basal Ganglia Volume and Shape in Children With Attention Deficit  
728 Hyperactivity Disorder”. In: *The American Journal of Psychiatry* 166.1 (2009), pp. 74–82.  
729 DOI: [10.1176/appi.ajp.2008.08030426](https://doi.org/10.1176/appi.ajp.2008.08030426).
- 730 [60] Anqi Qiu et al. “Hippocampal-cortical structural connectivity disruptions in schizophre-  
731 nia: An integrated perspective from hippocampal shape, cortical thickness, and integrity  
732 of white matter bundles”. In: *NeuroImage* 52.4 (2010), pp. 1181–1189. DOI: [10.1016/j.](https://doi.org/10.1016/j.neuroimage.2010.05.046)  
733 [neuroimage.2010.05.046](https://doi.org/10.1016/j.neuroimage.2010.05.046).
- 734 [61] Anqi Qiu et al. “Region-of-interest-based analysis with application of cortical thickness  
735 variation of left planum temporale in schizophrenia and psychotic bipolar disorder”. In:  
736 *Human Brain Mapping* 29.8 (2008), pp. 973–985. DOI: [10.1002/hbm.20444](https://doi.org/10.1002/hbm.20444).
- 737 [62] J Tilak Ratnanather, Chin-Fu Liu, and Michael I Miller. “Shape Diffeomorphometry of  
738 Brain Structures in Neurodegeneration and Neurodevelopment”. In: *Handbook of Neu-*  
739 *roengineering*. Ed. by Nitish V. Thakor. Singapore: Springer Singapore, 2022, pp. 1–22.
- 740 [63] Dan Wu and Susumu Mori. “Structural Neuroimaging: From Macroscopic to Microscopic  
741 Scales”. In: *Handbook of Neuroengineering*. Ed. by Nitish V. Thakor. Singapore: Springer  
742 Singapore, 2023, pp. 2917–2951.
- 743 [64] Jun Ma, Michael I. Miller, and Laurent Younes. “A Bayesian Generative Model for Surface  
744 Template Estimation”. In: *International Journal of Biomedical Imaging* 2010 (2010),  
745 pp. 1–14. DOI: [10.1155/2010/974957](https://doi.org/10.1155/2010/974957).
- 746 [65] Denis Mongin et al. “Imputing missing data of function and disease activity in rheuma-  
747 toid arthritis registers: what is the best technique?” In: *RMD open* 5.2 (2019), e000994.
- 748 [66] Estelle Nakul, Fabrice Bartolomei, and Christophe Lopez. “Vestibular-Evoked Cerebral  
749 Potentials”. In: *Frontiers in Neurology* 12 (Sept. 2021), p. 674100. ISSN: 1664-2295.



- 750 DOI: [10.3389/fneur.2021.674100](https://doi.org/10.3389/fneur.2021.674100). URL: [https://search.proquest.com/docview/](https://search.proquest.com/docview/2580691248)  
751 [2580691248](https://search.proquest.com/docview/2580691248).
- 752 [67] C. Lopez, O. Blanke, and F. W. Mast. “The human vestibular cortex revealed by coordinate-  
753 based activation likelihood estimation meta-analysis”. In: *Neuroscience* 212 (June 2012),  
754 pp. 159–179. DOI: [10.1016/j.neuroscience.2012.03.028](https://doi.org/10.1016/j.neuroscience.2012.03.028). URL: [https://www.](https://www.clinicalkey.es/playcontent/1-s2.0-S0306452212002898)  
755 [clinicalkey.es/playcontent/1-s2.0-S0306452212002898](https://www.clinicalkey.es/playcontent/1-s2.0-S0306452212002898).
- 756 [68] P. Zu Eulenburg et al. “Meta-analytical definition and functional connectivity of the hu-  
757 man vestibular cortex”. In: *NeuroImage* 60.1 (2011), p. 162. DOI: [10.1016/j.neuroimage.](https://doi.org/10.1016/j.neuroimage.2011.12.032)  
758 [2011.12.032](https://doi.org/10.1016/j.neuroimage.2011.12.032).
- 759 [69] Klaus Jahn et al. “Inverse U-shaped curve for age dependency of torsional eye move-  
760 ment responses to galvanic vestibular stimulation”. In: *Brain* 126.7 (2003), p. 1579. DOI:  
761 [10.1093/brain/awg163](https://doi.org/10.1093/brain/awg163).
- 762 [70] Peter Zu Eulenburg et al. “Ageing-related changes in the cortical processing of otolith  
763 information in humans”. In: *European Journal of Neuroscience* 46.12 (Nov. 2017), p. 2817.  
764 ISSN: 0953-816X. DOI: [10.1111/ejn.13755](https://doi.org/10.1111/ejn.13755).
- 765 [71] Edmund T. Rolls et al. “Prefrontal and somatosensory-motor cortex effective connectivity  
766 in humans”. In: *Cerebral Cortex* 33.8 (2023), p. 4939. DOI: [10.1093/cercor/bhac391](https://doi.org/10.1093/cercor/bhac391).
- 767 [72] S. Ebata et al. “Vestibular projection to the periarculate cortex in the monkey”. In: *Neu-  
768 roscience Research* 49.1 (2004), p. 55. DOI: [10.1016/j.neures.2004.01.012](https://doi.org/10.1016/j.neures.2004.01.012).
- 769 [73] Safiye Çavdar et al. “The brainstem connections of the supplementary motor area and  
770 its relations to the corticospinal tract: Experimental rat and human 3-tesla tractography  
771 study”. In: *Neuroscience Letters* 798 (2023). DOI: [10.1016/j.neulet.2023.137099](https://doi.org/10.1016/j.neulet.2023.137099).
- 772 [74] Sam J Gilbert et al. “Functional specialization within rostral prefrontal cortex (area 10):  
773 a meta-analysis”. In: *Journal of Cognitive Neuroscience* 18.6 (2006), pp. 932–948.
- 774 [75] Edmund T. Rolls et al. “The connectivity of the human frontal pole cortex, and a theory  
775 of its involvement in exploit versus explore”. In: *Cerebral Cortex (New York, N.Y.: 1991)*  
776 (Nov. 2023). DOI: [10.1093/cercor/bhad416](https://doi.org/10.1093/cercor/bhad416). URL: [https://search.proquest.com/](https://search.proquest.com/docview/2892660264)  
777 [docview/2892660264](https://search.proquest.com/docview/2892660264).

- 778 [76] Ke Peng et al. “Brodmann area 10: Collating, integrating and high level processing of  
779 nociception and pain”. In: *Progress in Neurobiology* 161 (Feb. 2018), pp. 1–22. ISSN:  
780 0301-0082. DOI: [10.1016/j.pneurobio.2017.11.004](https://doi.org/10.1016/j.pneurobio.2017.11.004). URL: [https://www.ncbi.nlm.](https://www.ncbi.nlm.nih.gov/pubmed/29199137)  
781 [nih.gov/pubmed/29199137](https://www.ncbi.nlm.nih.gov/pubmed/29199137).
- 782 [77] Maya Danneels et al. “The impact of vestibular function on cognitive-motor interference:  
783 a case-control study on dual-tasking in persons with bilateral vestibulopathy and nor-  
784 mal hearing”. In: *Scientific Reports* 13.1 (Aug. 2023), p. 13772. ISSN: 2045-2322. DOI:  
785 [10.1038/s41598-023-40465-2](https://doi.org/10.1038/s41598-023-40465-2). URL: [https://search.proquest.com/docview/](https://search.proquest.com/docview/2856166563)  
786 [2856166563](https://search.proquest.com/docview/2856166563).
- 787 [78] Kathleen E. Hupfeld et al. “Differential Relationships Between Brain Structure and Dual  
788 Task Walking in Young and Older Adults”. In: *Frontiers in Aging Neuroscience* 14 (Mar.  
789 2022). DOI: [10.3389/fnagi.2022.809281](https://doi.org/10.3389/fnagi.2022.809281).
- 790 [79] Joyce Bosmans et al. “Associations of Bilateral Vestibulopathy With Cognition in Older  
791 Adults Matched With Healthy Controls for Hearing Status”. In: *JAMA Otolaryngology–*  
792 *Head & Neck Surgery* 148.8 (2022). DOI: [10.1001/jamaoto.2022.1303](https://doi.org/10.1001/jamaoto.2022.1303).
- 793 [80] Eric X. Wei et al. “Psychometric Tests and Spatial Navigation: Data From the Baltimore  
794 Longitudinal Study of Aging”. In: *Frontiers in Neurology* 11 (June 2020). DOI: [10.3389/](https://doi.org/10.3389/fneur.2020.00484)  
795 [fneur.2020.00484](https://doi.org/10.3389/fneur.2020.00484).
- 796 [81] Luzia Grabherr et al. “Mental transformation abilities in patients with unilateral and bi-  
797 lateral vestibular loss”. In: *Experimental brain research* 209.2 (Mar. 2011), pp. 205–214.  
798 DOI: [10.1007/s00221-011-2535-0](https://doi.org/10.1007/s00221-011-2535-0). URL: [https://link.springer.com/article/10.](https://link.springer.com/article/10.1007/s00221-011-2535-0)  
799 [1007/s00221-011-2535-0](https://link.springer.com/article/10.1007/s00221-011-2535-0).
- 800 [82] Ivan Moser et al. “Impaired math achievement in patients with acute vestibular neuritis”.  
801 In: *Neuropsychologia* 107 (Dec. 2017), pp. 1–8. DOI: [10.1016/j.neuropsychologia.](https://doi.org/10.1016/j.neuropsychologia.2017.10.032)  
802 [2017.10.032](https://doi.org/10.1016/j.neuropsychologia.2017.10.032). URL: [https://dx.doi.org/10.1016/j.neuropsychologia.2017.10.](https://dx.doi.org/10.1016/j.neuropsychologia.2017.10.032)  
803 [032](https://dx.doi.org/10.1016/j.neuropsychologia.2017.10.032).
- 804 [83] Nora Preuss, Fred Mast, and Gregor Hasler. “Purchase decision-making is modulated by  
805 vestibular stimulation”. In: *Frontiers in behavioral neuroscience* 8 (2014), p. 51.
- 806 [84] Ede A. Rancz et al. “Widespread Vestibular Activation of the Rodent Cortex”. In: *The*  
807 *Journal of neuroscience* 35.15 (Apr. 2015), pp. 5926–5934. DOI: [10.1523/JNEUROSCI.](https://doi.org/10.1523/JNEUROSCI.1869-14.2015)  
808 [1869-14.2015](https://doi.org/10.1523/JNEUROSCI.1869-14.2015). URL: <https://www.ncbi.nlm.nih.gov/pubmed/25878265>.

- 809 [85] Max Gattie, Elena V. M. Lieven, and Karolina Kluk. “Weak Vestibular Response in Per-  
810 sistent Developmental Stuttering”. In: *Frontiers in Integrative Neuroscience* 15 (Sept.  
811 2021), p. 662127. ISSN: 1662-5145. DOI: [10.3389/fnint.2021.662127](https://doi.org/10.3389/fnint.2021.662127). URL: <https://search.proquest.com/docview/2568282652>.  
812
- 813 [86] Seyede Faranak Emami et al. “Vestibular hearing and speech processing”. In: *International Scholarly Research Notices* 2012 (2012).  
814
- 815 [87] Seyede Faranak Emami. “Central representation of cervical vestibular evoked myogenic  
816 potentials”. In: *Indian Journal of Otolaryngology and Head & Neck Surgery* 75.3 (2023),  
817 pp. 2722–2728.
- 818 [88] Lucy Stiles and Paul F. Smith. “The vestibular–basal ganglia connection: Balancing motor  
819 control”. In: *Brain research* 1597 (Feb. 2015), pp. 180–188. DOI: [10.1016/j.brainres.2014.11.063](https://doi.org/10.1016/j.brainres.2014.11.063). URL: <https://www.clinicalkey.es/playcontent/1-s2.0-S0006899314016709>.  
820
- 821 [89] Diane Deroualle and Christophe Lopez. “Toward a vestibular contribution to social cog-  
822 nition”. In: *Frontiers in Integrative Neuroscience* 8 (2014), p. 16.
- 823 [90] Eric Anson et al. “Failure on the Foam Eyes Closed Test of Standing Balance Associated  
824 With Reduced Semicircular Canal Function in Healthy Older Adults”. In: *Ear Hearing*  
825 40.2 (Mar. 2020), p. 340. ISSN: 0196-0202. DOI: [10.1097/aud.0000000000000619](https://doi.org/10.1097/aud.0000000000000619).
- 826 [91] John Ashburner and Karl J. Friston. “Diffeomorphic registration using geodesic shoot-  
827 ing and Gauss–Newton optimisation”. In: *NeuroImage (Orlando, Fla.)* 55.3 (Apr. 2011),  
828 pp. 954–967. DOI: [10.1016/j.neuroimage.2010.12.049](https://doi.org/10.1016/j.neuroimage.2010.12.049). URL: <https://dx.doi.org/10.1016/j.neuroimage.2010.12.049>.  
829
- 830 [92] Christos Davatzikos. “Why voxel-based morphometric analysis should be used with great  
831 caution when characterizing group differences”. In: *NeuroImage (Orlando, Fla.)* 23.1  
832 (Sept. 2004), pp. 17–20. DOI: [10.1016/j.neuroimage.2004.05.010](https://doi.org/10.1016/j.neuroimage.2004.05.010). URL: <https://dx.doi.org/10.1016/j.neuroimage.2004.05.010>.  
833
- 834 [93] J. Tilak Ratnanather et al. “3D Normal Coordinate Systems for Cortical Areas”. In: *Lecture Notes Series, Institute for Mathematical Sciences, National University of Singapore*  
835 (2019), p. 167. DOI: [10.1142/9789811200137\\_0007](https://doi.org/10.1142/9789811200137_0007).  
836
- 837 [94] Casey Paquola et al. “Closing the mechanistic gap: the value of microarchitecture in  
838 understanding cognitive networks”. In: *Trends in cognitive sciences* 26.10 (Oct. 2022),

- 839 pp. 873–886. DOI: [10.1016/j.tics.2022.07.001](https://doi.org/10.1016/j.tics.2022.07.001). URL: <https://search.proquest.com/docview/2697095787>.
- 840
- 841 [95] Karen E Seymour et al. “Anomalous subcortical morphology in boys, but not girls, with  
842 ADHD compared to typically developing controls and correlates with emotion dysregulation”. In: *Psychiatry Research: Neuroimaging* 261 (2017), pp. 20–28.
- 843
- 844 [96] Xiaoying Tang et al. “Response control correlates of anomalous basal ganglia morphology in boys, but not girls, with attention-deficit/hyperactivity disorder”. In: *Behavioural Brain Research* 367 (2019), pp. 117–127.
- 845
- 846
- 847 [97] William Hedley Thompson et al. “Dataset decay and the problem of sequential analyses on open datasets”. In: *eLife* 9 (May 2020). DOI: [10.7554/elife.53498](https://doi.org/10.7554/elife.53498).
- 848
- 849 [98] R. A. I. Bethlehem et al. “Brain charts for the human lifespan”. In: *Nature (London)* 604.7906 (Apr. 2022), pp. 525–533. DOI: [10.1038/s41586-022-04554-y](https://doi.org/10.1038/s41586-022-04554-y). URL: <https://www.narcis.nl/publication/RecordID/oai:cris.maastrichtuniversity.nl:publications%2Fc75d36bd-c842-4929-b45d-1f2001df4a1d>.
- 850
- 851
- 852
- 853 [99] Daniel Zachlod et al. “Mapping Cytoarchitectonics and Receptor Architectonics to Understand Brain Function and Connectivity”. In: *Biological psychiatry (1969)* 93.5 (Mar. 2023), pp. 471–479. DOI: [10.1016/j.biopsych.2022.09.014](https://doi.org/10.1016/j.biopsych.2022.09.014). URL: <https://dx.doi.org/10.1016/j.biopsych.2022.09.014>.
- 854
- 855
- 856
- 857 [100] Jeremy L. Smith et al. “Eagle-449: A volumetric, whole-brain compilation of brain atlases for vestibular functional MRI research”. In: *Scientific Data* 10.1 (2023). DOI: [10.1038/s41597-023-01938-1](https://doi.org/10.1038/s41597-023-01938-1).
- 858
- 859
- 860 [101] Simon B. Eickhoff, B. T. Thomas Yeo, and Sarah Genon. “Imaging-based parcellations of the human brain”. In: *Nature Reviews Neuroscience* 19.11 (Nov. 2018), pp. 672–86.
- 861
- 862 [102] Chu-Chung Huang et al. “An extended Human Connectome Project multimodal parcellation atlas of the human cortex and subcortical areas”. In: *Brain Structure and Function* 227.3 (2022), pp. 763–778.
- 863
- 864
